# Supplementary material
Source: Springer Nature journal article supplement (https://www.springermedizin.de/resource/supplementary/12974_2010_375_MOESM4_ESM.pdf/9601522)

**4A**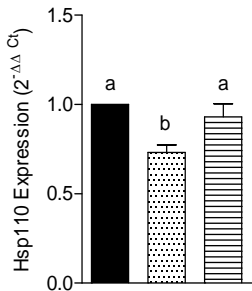**4C**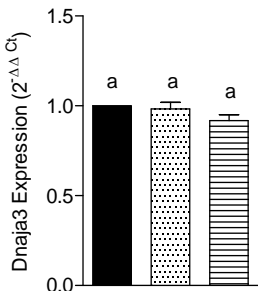**4B**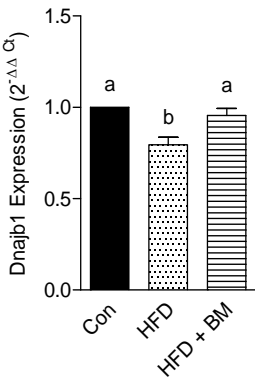**4D**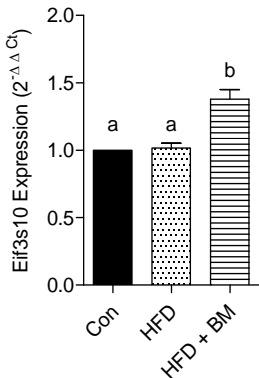

Supplement: MOESM4 [file 9601522]
